# Supplementary material
Source: publisher figshare collection journal article supplement (https://tandf.figshare.com/articles/dataset/_/21829523)
Supplement: Supplementary file 1 [file 1]

# **Traumaassoziierte Probleme der psychischen Gesundheit bei Mitarbeitern nationaler humanitärer Hilfsorganisationen: Ein systematischer Literaturreview**

Hannah Strohmeier, Willem Feike Scholte

## **Abstract**

Hintergrund: Die Arbeit in humanitären Krisensituationen weist ein hohes Gefahrenpotenzial auf. Mitarbeiter nationaler humanitärer Hilfsorganisationen sind dem Risiko der primären und sekundären Traumatisierung besonders ausgesetzt, was zu psychischen Problemen führen kann. Ungeachtet dessen ist Forschung zur psychischen Gesundheit von Mitarbeitern nationaler Organisationen rar und eine systematische Analyse aktueller Befunde hat noch nicht stattgefunden.

Ziel: Diese Arbeit sichtet die vorhandene Literatur zu traumaassoziierten psychischen Problemen unter Mitarbeitern nationaler humanitärer Hilfsorganisationen. Der Fokus liegt auf der Prävalenz ausgewählter psychischer Probleme in Relation zu diversen Vergleichsgruppen, dem Geschlecht und/oder Gender als prädiktiven Faktoren für psychische Probleme und dem Einfluss der Organisationsformen auf ebendiese.

Methode: Drei Datenbanken wurden systematisch nach relevanten englischsprachigen und in Peer-Review-Zeitschriften publizierten Studien durchsucht.

Ergebnisse: 14 Artikel erfüllten die Einschlusskriterien. Die Befunde lassen annehmen, dass Mitarbeiter nationaler Organisationen psychische Probleme durchleben und dass die Prävalenz von posttraumatischen Belastungsstörungen, Depressionen und Angststörungen unter diesen Beschäftigten jener der Vergleichsgruppe zumeist ähnelt oder höher ist. Forschung zu Suchterkrankungen und zu suizidalem Verhalten unter Mitarbeitern nationaler Organisationen ist besonders rar. Der Zusammenhang zwischen Geschlecht und/oder Gender und psychischen Problemen unter Mitarbeitern nationaler Organisationen erscheint komplex, und die Unterstützung der Organisation scheint eine wichtige Determinante im Zusammenhang mit psychischer Gesundheit zu sein.

Schlussfolgerungen: Alle Erkenntnisse sprechen für die Notwendigkeit einer erhöhten Aufmerksamkeit durch die Gemeinschaft humanitärer Organisationen und weitergehender Forschung auf diesem Gebiet.

Keywords: psychische Erkrankung, Posttraumatische Belastungsstörung, PTBS, Depression, Angststörung, Suchterkrankung, Suizid, Einsatzkräfte, Entwicklungshelfer, humanitäre Organisation

Name of translator: A. Kapias, B. Lueger-Schuster

**Citation:** European Journal of Psychotraumatology 2015, 6: 28541 - <http://dx.doi.org/10.3402/ejpt.v6.28541>
