# Supplementary material
Source: publisher figshare collection journal article supplement (https://tandf.figshare.com/articles/dataset/_/21829523)
Supplement: Supplementary file 2 [file 1]

## Ulusal İnsani Personel arasında Travma alakalı Mental Sağlık Konuları: Literatürün Sistematik Yeniden İncelenmesi

Hannah Strohmeier, Willem Feike Scholte

**Arkaplan:** İnsani kriz durumlarında çalışmak oldukça tehlikelidir. Ulusal insani personeli mental sağlık sorunlarına sebep olabilen birincil ya da ikincil travmaya maruz kalma riski durumları ile karşılaşır. Buna rağmen, ulusal personelin mental sağlığı üzerine araştırmalar nadirdir ve güncel olan bulgular henüz incelenmemiştir. **Amaç:** Bu çalışma ulusal insani personeli arasındaki travma alakalı mental sağlık sorunları üzerine ulaşılabilir literatürü gözden geçirmektedir. **Araştırma referans gruplarıyla** alakalı olarak seçilen sağlık sorunlarının yaygınlığına; mental sağlık sorunlarının yordayıcı faktörü olarak cinsiyet konusuna; mental sağlık problemleri üzerinde organizasyon tipinin etkisi konusu üzerine odaklanmaktadır. **Yöntem:** Akran değerlendirmesi yapan dergilerdeki İngilizce dilinde basılmış alakalı çalışmalar için üç veritabanı sistematik olara incelenmiştir. **Sonuçlar:** On dört makale dahil edilme kriterlerine uymuştur. Bulgular ulusal sağlık personelinin mental sağlık problemlerini deneyimlediğini, ve bu çalışma grubunun travma sonrası stres bozukluğunun, depresyonun ve kaygının referans grupları arasındaki oldukça benzediği ya da bu gruplardan daha yüksek olduğunu öne sürmektedir. Ulusal personel arasındaki madde kullanımı bozukluğu ve intihar davranışları üzerindeki araştırmalar oldukça nadirdir. Ulusal personelinde mental sağlık problemi ve cinsiyet arasındaki ilişki oldukça karmaşık gözükmemektedir, kurumsal personel desteği mental sağlık açısından oldukça önemli bir belirleyici olarak görülmektedir. **Tartışma:** Tüm bulgular insani topluluğa dikkatin artırılmasını ve yeni çalışmaları gerektirmektedir.

**Keywords:** Mental hastalıklar, travma sonrası stres bozukluğu; TSSB; depresyon; kaygı bozukluğu; madde kullanımı bozukluğu; intihar; rahatlatma çalışanları; yardım çalışanları; insani organizasyon

Name of translator: Seray Akça

**Citation:** European Journal of Psychotraumatology 2015, 6: 28541 - <http://dx.doi.org/10.3402/ejpt.v6.28541>
