# Supplementary material
Source: publisher figshare collection journal article supplement (https://tandf.figshare.com/articles/dataset/_/21829523)
Supplement: Supplementary file 3 [file 1]

# Trauma-related Mental Health Issues Among National Humanitarian Staff: A Systematic Review of the Literature

Hannah Strohmeier, Willem Feike Scholte

## Samenvatting

**Achtergrond:** Werken in humanitaire crisissituaties is gevaarlijk. Vooral nationale staf loopt het risico op primaire en secundaire traumatisering, wat kan leiden tot psychische klachten. Desondanks zijn er weinig studies naar de psychische gezondheid van nationale staf, en bestaat er nog geen systematische analyse van actuele bevindingen. **Doel:** Dit artikel verschaft een overzicht van de beschikbare literatuur over trauma-gerelateerde psychische klachten onder nationale humanitaire staf. Het richt zich met name op de prevalentie van specifieke klachten in relatie tot referentiegroepen; op sekse/gender als voorspellende factor voor psychische klachten; en op de invloed van het soort organisatie op psychische klachten. **Methode:** Drie databases werden systematisch doorgezocht op relevante Engelstalige studies in peer-reviewed tijdschriften. **Resultaten:** Veertien artikelen voldeden aan de inclusiecriteria. De bevindingen suggereren dat psychische klachten vóórkomen onder nationale staf, en dat de prevalenties van posttraumatische stress stoornis, depressie en angst onder de betreffende beroepsgroep meestal gelijk of groter zijn dan onder de referentiegroepen. Studies over middelenmisbruik ontbreken goeddeels, evenals over suïcidaal gedrag. De relatie tussen sekse en/of gender en psychische klachten onder nationale staf blijkt complex, en ondersteuning van staf door de organisatie lijkt een belangrijke determinant te zijn van psychische gezondheid. **Conclusie:** Alle bevindingen wijzen op het belang van meer aandacht van de humanitaire gemeenschap en meer wetenschappelijk onderzoek met betrekking tot het onderwerp.

**Citation:** European Journal of Psychotraumatology 2015, 6: 28541 - <http://dx.doi.org/10.3402/ejpt.v6.28541>
