# Supplementary material
Source: publisher figshare collection journal article supplement (https://tandf.figshare.com/articles/dataset/_/21829523)
Supplement: Supplementary file 4 [file 1]

# **Травмо-ориентированные проблемы с психическим здоровьем среди персонала органов Красного Креста: систематический обзор литературы**

Hannah Strohmeier, Willem Feike Scholte

## **Аннотация**

История вопроса: Работа в ситуациях гуманитарного кризиса считается опасной. В частности, персонал органов Красного Креста сталкивается с риском первичного и вторичного воздействия травмы, что может привести к проблемам с психическим здоровьем. Несмотря на это, мало внимания уделяется исследованиям психического здоровья национальных кадров, а систематический анализ последних полученных данных еще не был предпринят.

Цель: В настоящей статье рассматривается имеющаяся литература по проблемам психического здоровья персонала органов Красного Креста. В центре обзора распространенность отдельных проблем с психическим здоровьем в отношении референтных групп; пол и/или гендер, как прогностические факторы проблем с психическим здоровьем; а также влияние организационных вопросов на проблемы с психическим здоровьем.

Метод: В трех базах данных был проведен систематический поиск сведений о соответствующих исследованиях, опубликованных на английском языке в рецензируемых журналах.

Результаты: Критериям поиска соответствовали четырнадцать статей. Полученные данные свидетельствуют, что сотрудники органов Красного Креста имеют опыт проблем с психическим здоровьем. Распространенность посттравматического стрессового расстройства, депрессии и тревоги у представителей этой группы, в основном, аналогична или выше, чем среди референтных групп. Отмечается недостаточность исследований, проведенных среди сотрудников органов Красного Креста на предмет суицидального поведения и употребления психотропных веществ. Связь между полом и/или гендером и проблемами с психическим здоровьем среди национальных кадров имеет комплексный характер, а организационная поддержка персонала, представляется важным, определяющим фактором для психического здоровья.

Вывод: Все полученные данные требуют повышенного внимания Красного Креста и дальнейших исследований по данной теме.

Ключевые слова: Психическое заболевание; посттравматическое стрессовое расстройство; ПТСР; депрессия; тревожное расстройство; психотропные вещества; суицид; сотрудники органов Красного Креста

Name of translator: Shcherbak Marina

**Citation:** European Journal of Psychotraumatology 2015, 6: 28541 - <http://dx.doi.org/10.3402/ejpt.v6.28541>
