# Supplementary material
Source: publisher figshare collection journal article supplement (https://tandf.figshare.com/articles/dataset/_/21829523)
Supplement: Supplementary file 5 [file 1]

Hannah Strohmeier, Willem Feike Scholte

Związane z traumą problemy ze zdrowiem psychicznym wśród pracowników krajowych służb humanitarnych: przegląd literaturowy

**Wprowadzenie:** Praca w krajowych służbach humanitarnych jest bardzo niebezpieczna. Aktywność taka wiąże się z ryzykiem wtórnej traumatyzacji, która stanowi istotny czynnik ryzyka zaburzeń psychicznych. Pomimo dużej częstotliwości występowania zaburzeń psychicznych wśród tej grupy zawodowej, wciąż brakuje badań nad wyżej wspomnianym tematem.

**Cel:** Celem tej pracy było dokonanie wyczerpującego przeglądu literaturowego na temat związanych z traumą problemów ze zdrowiem psychicznym wśród pracowników krajowych służb humanitarnych. W przeglądzie tym skupiono się na stopniu rozpowszechnienia problemów ze zdrowiem psychicznym w tej grupie badanych, czynnikach ryzyka (np. płci) oraz znaczeniu rodzaju organizacji humanitarnych, w których członkowie tych służb pracowali.

**Metoda:** Dokonano przeglądu recenzowanych artykułów naukowych zamieszczonych w różnych bazach naukowych i napisanych w języku angielskim.

**Wyniki:** Czternaście artykułów spełniało kryteria włączenia do analizy. Wyniki przeglądu literaturowego wskazują na fakt, że członkowie służb humanitarnych doświadczają problemów ze zdrowiem psychicznym, z których najczęstsze to zaburzenie po stresie traumatycznym, depresja i lęk. Brakuje doniesień na temat nadużywania substancji psychoaktywnych oraz zachowań samobójczych. Doniesienia na temat roli płci w tym zakresie są niejednoznaczne. Istotną, ochronną rolę odgrywa zaś wsparcie instytucjonalne, płynące z organizacji, w których takie osoby pracują.

**Konkluzje:** Wyniki niniejszego przeglądu literaturowego zwracają uwagę na zagadnienie zdrowia psychicznego wśród pracowników krajowych służb humanitarnych.

**Słowa kluczowe:** choroba psychiczna; zaburzenie po stresie traumatycznym; depresja; lęk; nadużywanie substancji psychoaktywnych; samobójstwo; pracownicy służb humanitarnych

**Name of translator:** Marcin Rzeszutek, University of Finance and Management in Warsaw, Poland

**Citation:** European Journal of Psychotraumatology 2015, 6: 28541 - <http://dx.doi.org/10.3402/ejpt.v6.28541>
